# Supplementary material for: Silylation of higher fullerenesElectronic supplementary information (ESI) available: Experimental Section. See http://www.rsc.org/suppdata/jm/b2/b201118b/
Source: Royal Society of Chemistry journal article supplement (doi:10.1039/b201118b), 2002-05-09
Supplement: b201118b.doc [file b201118b.doc]

##### Supplementary data

### Experimental Section

The higher fullerenes (C70, C76(*D2*), C84(*D2*)) were purified by a previously reported method.5, 9 Their purities were confirmed by HPLC analysis and 13C-NMR measurement.

Cyclic voltammetry (CV) experiments were performed at a 1 mM analyte concentration in 1,2-dichlorobenzene with 0.1 M Bu4NPF6, a Ag/AgNO3 (CH3CN)

reference electrode, and a Pt disc working electrode. Ferrocene (0.5 mM) was added as the internal reference. The scan rate was 20 mV/s. Differential pulse voltammetry (DPV) experiments were carried out under the same conditions as for the CV measurements. The pulse amplitude, pulse width and pulse period were 50 mV, 50 ms and 200 ms, respectively. The scan rate was 20 mV/s.

**The reaction of C70** **with silylene :** A 13 ml solution of C70 (26.2 mg, 0.031mmol) and 2,2-bis(2,6-diisopropylphenyl)hexamethyltrisilane (17.6 mg, 0.040mmol) as a silylene precursor in toluene was photolyzed with a low-pressure mercury arc lamp for 2 hours, the reaction mixture was injected into the preparative Gel 1H + 2H column during the first stage, and bis(2,6-diisopropylphenyl)silane **2** was isolated along with unreacted C70 and the bis-adduct. The two pure adducts (**2a**-**2b**)2bwere isolated in the second stage using a Buckyprep column

**The reaction of C76** **with disilirane 3** : A 25 ml solution of C76 (10 mg, 0.011mmol) and **3** (12 mg, 0.022mmol) in toluene was placed in a Pyrex tube degassed by freeze-pump-thaw cycles under reduced pressure, then irradiated with a halogen lamp (cut off <400 nm) for 24 hours. The reaction mixture was injected into the preparative Gel 1H + 2H column during the first stage. 1,1,3,3-Tetramesityl-1,3-disiloane **9** was isolated in 66% yield with 2% unreacted C76 and 10% bis-adduct. The three pure adducts (**9a**-**9c**)were isolated in the second stage using a Buckyprep column and one adduct was isolated in pure form in the third stage by a Buckyclutcher column. The four isomers (**9a**-**9d**) were isolated with 15.2, 6.2, 4.1 and 13.3% yields. Their spectral data are listed as follows:

9a: UV/VIS (CS2) max: 885(sh), 846, 750(sh), 704, 620, 570(sh), 506(sh), 440(sh); 1H-NMR (300 MHz, CS2/CDCl3, 213 K):  6.83(s, 1H), 6.78(s, 1H), 6.75(s, 1H), 6.68(s, 2H), 6.64(s, 1H), 6.51(s, 1H), 6.47(s, 1H), 3.34(s, 3H), 2.68(s, 3H), 2.44(d, J=14.8 Hz, 1H), 2.30(s, 3H), 2.27(s, 3H), 2.24(s, 3H), 2.23(s, 3H), 2.17(s, 3H), 2.11(s, 3H), 2.10(s, 6H), 1.99(s, 3H), 1.94(d, J=14.8 Hz, 1H), 1.83(s, 3H); 13C-NMR (125 MHz, C2D2Cl4, 233 K):  163.90, 156.90, 150.75, 150.31, 150.17, 148.72, 148.24, 147.76, 147.57, 147.26, 147.15, 146.98, 146.84, 146.64, 146.55, 146.26, 126.21, 145.60, 145.34, 145.12, 144.79, 144.71, 144.61, 144.63, 144.57, 144.34, 144.18, 144.10, 143.85, 143.79, 143.64, 143.53, 143.46, 143.17, 143.05, 142.93, 142.56, 142.50, 141.98, 141.83, 141.76 141.62, 141.49, 141.43, 141.16, 140.99, 140.90, 140.87, 140.85, 140.69, 140.52, 140.51, 140.99, 140.10, 139.81, 139.54, 139.47, 139.28, 139.11, 138.94, 138.90, 138.87, 138.84, 138.80, 138.62, 138.54; 138.07, 137.71, 137.42, 137.32, 136.82, 136.35, 135.99, 135.71, 135.16, 133.22, 132.62, 132.56, 131.84, 130.83, 130.61, 130.52, 130.48, 130.00, 129.77, 128.78, 128.12, 127.96, 127.25, 125.04, 124.97, 61.87, 60.98, 30.06, 27.45, 26.09, 25.41, 25.24, 24.81, 23.49, 23.01, 20.87, 20.81, 20.72, 20.71, 9.24; 29Si- NMR (100 MHz, CS2/CDCl3, 233 K):  -11.16, -14.34; FABMS *m/z:* 1462-1458

9b: UV/VIS (CS2) max: 865, 669, 600, 564, 506(sh); 1H-NMR (300 MHz, CDCl3/CS2, 295 K):  6.85(s, 1H), 6.78(s, 1H), 6.67(s, 2H), 6.64(s, 1H), 6.61(s, 2H), 6.59(s, 1H), 3.35(s, 3H), 3.08(s, 3H), 2.26(s, 3H), 2.24(s, 3H), 2.18(s, 3H), 2.17(s, 3H), 2.10(s, 3H), 2.05(s, 3H), 2.00(s, 3H), 1.99(d, J=15.6 Hz, 1H), 1.98(s, 3H), 1.95(s, 3H), 1.94(s, 3H), 1.92(d, J=15.6 Hz, 1H); 13C-NMR (125 MHz, CS2/CDCl3, 295 K):  163.54, 161.90, 160.40, 156.46, 153.84, 151.99, 150.33, 149.71, 149.41, 149.09, 148.67, 148.56, 148.32, 147.61, 147.20, 146.59, 146.40, 146.38, 146.00, 145.90, 145.74, 145.59, 145.35, 145.28, 145.00, 144.79, 144.62, 144.32, 144.14, 143.96, 143.85, 143.77, 143.75, 143.71, 143.62, 143.52, 143.39, 143.36, 143.30, 143.16, 143.10, 143.01, 142.96, 142.39, 142.29, 142.25, 141.80, 141.67, 141.26, 140.82, 140.38, 140.32, 140.26, 140.22, 140.14, 140.06, 139.92, 139.71, 139.51, 138.62, 138.57, 138.04, 137.71, 137.70, 137.57, 137.53, 137.48, 137.43, 136.52, 136.02, 135.74, 134.80, 133.53, 132.58, 130.72, 130.57, 130.51, 130.04, 129.61, 129.54, 129.53, 129.40, 129.32, 128.73, 128.56, 127.31, 64.85, 63.97, 28.01, 26.60, 24.56, 24.24, 23.77, 23.25, 22.60, 20.26, 20.14, 7.28; 29Si-NMR (100 MHz, CS2/CDCl3, 295 K):  -7.37, -10.40; FABMS *m/z:* 1462-1458

9c: UV/VIS (CS2) max: 920(sh), 805(sh), 758, 660, 589(sh), 538(sh), 498(sh), 449; 1H-NMR (300 MHz, CS2/CDCl3, 213 K):  6.98(s, 1H), 6.93(s, 1H), 6.86(s, 1H), 6.81(s, 1H), 6.75(s, 1H), 6,73(s, 1H), 6.49(s, 1H), 6.47(s, 1H), 3.68(s, 3H), 2.90(s, 3H), 2.75(s, 3H), 2.39(s, 3H), 2.33(s, 3H), 2.29(s, 6H), 2.21(s, 3H), 2.16(s, 3H), 2.14(d, J= 14.5 Hz, 1H), 2.10(s, 3H), 2.07(s, 3H), 2.04(d, J= 14.5 Hz, 1H), 1.94(s, 3H); 13C-NMR (125 MHz, CS2/CDCl3, 233 K):  174.05, 162.61, 151.77, 150.78, 150.75, 150.34, 149.24, 149.14, 148.74, 148.67, 148.55, 148.28, 148.18, 148.00, 147.92; 147.89, 147.70, 147.37, 147.26, 147.21, 146.27, 146.18, 146.03, 145.84, 145.79, 145.53, 145.43, 145.22, 144.79, 144.36, 144.24, 144.15, 143.99, 143.88, 143.85; 143.69, 143.62, 143.57, 143.52, 143.50, 143.12, 142.84, 142.75, 142.48, 142.43, 142.39, 142.30, 142.11, 142.05, 141.61, 141.60, 141.18, 141.09, 140.86, 140.80, 140.68, 140.59, 140.12, 140.06, 139.34, 138.92, 138.90, 138.74, 138.64, 138.61, 138.49, 138.37, 138.20, 138.19, 138.16, 137.91, 137.90, 137.89, 137.51, 136.32, 136.10, 133.72, 133.66, 133.50, 133.27, 132.64, 132.52, 131.63, 131.31, 130.81, 130.69, 130.32, 130.29, 130.01, 129.92, 129.89, 129.74, 129.43, 128.32, 128.16, 63.66, 62.98, 27.58, 27.08, 26.41, 25.78, 25.55, 25.23, 23.38, 23.32, 21.29, 21.14, 21.06, 21.05, 7.08; 29Si-NMR (100 MHz, CS2/CDCl3, 233 K):  -15.03, -15.91; FABMS *m/z:* 1462-1458

9d: UV/VIS (CS2) max: 1064, 1024(sh), 983, 915, 849(sh), 756, 726, 637, 590(sh), 550(sh); 1H-NMR (300 MHz, CS2/CDCl3, 295 K):  6.91(s, 1H), 6.84(s, 1H), 6.69(s, 1H), 6.67(s, 1H), 6.63(s, 1H), 6.60(s, 1H), 6.53(s, 2H), 3.53(s, 3H), 3.35(s, 3H), 2.39(s, 3H), 2.34(s, 3H), 2.28(s, 3H), 2.25(s, 3H), 2.22(d, J= 12.1 Hz, 1H), 2.21(s, 2H), 2.16(s, 3H), 2.13(s, 3H), 2.12(d, J= 12.1 Hz, 1H), 2.06(s, 3H), 1.97(s, 3H), 1.91(s, 3H), 1.87(s, 3H); 13C-NMR (125 MHz, CS2/CDCl3, 295 K):  162.62, 152.99, 150.70, 150.55, 149.70, 149.46, 149.44, 149.40, 148.65, 148.10, 147.74, 147.63, 147.49, 147.15, 146.78, 146.70, 146.65, 146.38, 146.15, 146.10, 146.01, 145.86, 145.78, 145.57, 145.08, 145.01, 144.93, 144.88, 144.48, 144.44, 144.28, 144.15, 144.11, 143.55, 143.36, 143.19, 142.34, 142.26, 142.05, 142.00, 141.88, 141.74, 141.24, 141.18, 140.98, 140.95, 140.92, 140.86, 140.80, 140.61, 140.38, 140.29, 140.18, 140.12, 139.33, 139.29, 139.18, 139.06, 138.45, 138.42, 138.28, 138.26, 138.08, 137.66, 136.37, 136.24, 136.14, 135.75, 135.30, 134.25, 133.50, 133.39, 132.12, 131.94, 131.73, 131.55, 130.70, 130.56, 130.35, 130.30, 130.29, 130.20, 130.19, 130.14, 130.11, 130.04, 129.71, 129.67, 129.12, 128.99, 128.82, 128.40, 128.09, 128.08, 125.32, 124.65, 63.87, 62.83, 29.04, 28.29, 26.00, 25.89, 25.68, 23.60, 23.46, 21.09), 21.01, 20.98, 8.70; 29Si-NMR(100 MHz, CS2/CDCl3, 295 K):  -13.13, -14.85; FABMS *m/z:* 1462-1458.

**The reaction of C84** **with disilirane 3 :** A 40 ml solution of C84(*D2*) (16 mg, 0.016mmol) and **3** (44 mg, 0.08mmol) in toluene was place in a Pyrex tube, degassed by freeze-pump-thaw cycles under reduced pressure, then irradiated with a halogen lamp (cut off <400 nm) for 5.5 hours. The reaction mixture was injected into the preparative Gel 1H + 2H column during the first stage. 1,1,3,3-Tetramesityl-1,3-disiloane **10** was isolated along with the bis-adduct. The three pure adducts (**10a**-**10c**)were isolated in the second stage using a Buckyclutcher column. The 1H-NMR spectral data are listed as follows:

10a: 1H-NMR (300 MHz, CS2/CDCl3, 233 K):  6.91(s, 1H), 6.84(s, 1H), 6.74(s, 1H), 6.69(s, 1H), 6.64(s, 1H), 6.61(s, 1H), 6.55(s, 1H), 6.44(s, 1H), 3.43(s, 3H), 3.35(s, 3H), 2.37(s, 3H), 2.30(s, 3H), 2.27(s, 3H), 2.26(s, 3H), 2.15(s, 3H), 2.13(s, 3H), 2.10(s, 3H), 2.06(s, 3H), 2.03(s, 3H), 1.76(s, 3H).

10b: 1H -NMR (300 MHz, CS2/CDCl3, 233 K):  6.94(s, 2H), 6.75(s, 2H), 6.60(s, 2H), 6.48(s, 2H), 3.55(s, 6H), 2.59(s, 6H), 2.40(s, 2H), 2.32(s, 6H), 2.18(s, 6H), 2.05(s, 6H), 2.04(s, 6H).

10c: 1H-NMR (300 MHz, CS2/CDCl3, 293 K):  6.79(s, 1H), 6.73(s, 1H), 6.71(s, 1H), 6.60(s, 1H), 6.59(s, 1H), 6.55(s, 1H), 6.54(s, 1H), 6.50(s, 1H), 3.47(s, 3H), 3.26(s, 3H), 3.15 (d, J= 12.8 Hz, 1H), 2.57(s, 3H), 2.54(s, 3H), 2.36(s, 3H), 2.31(s, 3H), 2.30(s, 3H), 2.20(s, 3H), 2.17(s, 3H), 2.14(s, 3H), 2.14(s, 3H), 2.09(s, 3H), 1.55(d, J= 12.8 Hz, 1H).
